# Supplementary material for: DAF-16 and TCER-1 Facilitate Adaptation to Germline Loss by Restoring Lipid Homeostasis and Repressing Reproductive Physiology in C. elegans
Source: PubMed Central journal article supplement (PMC4749232; doi:10.1371/journal.pgen.1005788), 2016-02-10
Supplement: pgen.1005788.s010.pdf [file pgen.1005788.s010.pdf]

**Amrit et al., Table S2: Comparison of DAF-16 and TCER-1 targets with previous DAF-16 genomic studies**

**1. Comparison with DAF-16 'Consensus' Target List (Tepper et al., Cell. 2013, 154(3):676-90. PMID: 23911329)**

| Consensus Data Classes                                                     | # Genes |
|----------------------------------------------------------------------------|---------|
| DAF-16 +ve targets- Upregulated (correspond to UP class of this study)     | 1663    |
| DAF-16 -ve target - Downregulated (correspond to DOWN class of this study) | 1733    |

| RNA-Seq Gene Class           | "Consensus" Gene Class | Overlap | %      | Statistical Significance | Representation Factor |
|------------------------------|------------------------|---------|--------|--------------------------|-----------------------|
| DAF-16-Specific UP           | DAF-16 +ve targets     | 162/349 | 46.42% | p < 9.426e-80            | 5.4                   |
| DAF-16-Specific DOWN         | DAF-16 +ve targets     | 5/196   | 2.55%  | p < 4.646e-04            | 0.3                   |
| Joint DAF-16 and TCER-1 UP   | DAF-16 +ve targets     | 70/123  | 56.91% | p < 1.946e-42            | 6.6                   |
| Joint DAF-16 and TCER-1 DOWN | DAF-16 +ve targets     | 1/73    | 1.37%  | p < 0.011                | 0.2                   |
| Opposite DAF-16 and TCER-1   | DAF-16 +ve targets     | 44/60   | 73.33% | p < 3.189e-34            | 8.5                   |
| TCER-1-Specific UP           | DAF-16 +ve targets     | 28/213  | 13.15% | p < 0.016                | 1.5                   |
| TCER-1-Specific DOWN         | DAF-16 +ve targets     | 61/366  | 16.67% | p < 4.296e-07            | 1.9                   |
| DAF-16-Specific UP           | DAF-16 -ve targets     | 12/349  | 3.44%  | p < 3.494e-05            | 0.4                   |
| DAF-16-Specific DOWN         | DAF-16 -ve targets     | 110/196 | 56.12% | p < 1.991e-63            | 6.2                   |
| Joint DAF-16 and TCER-1 UP   | DAF-16 -ve targets     | 5/123   | 4.07%  | p < 0.030                | 0.5                   |
| Joint DAF-16 and TCER-1 DOWN | DAF-16 -ve targets     | 41/73   | 56.16% | p < 2.148e-24            | 6.3                   |
| Opposite DAF-16 and TCER-1   | DAF-16 -ve targets     | 21/60   | 35.00% | p < 2.409e-08            | 3.9                   |
| TCER-1-Specific UP           | DAF-16 -ve targets     | 64/213  | 30.05% | p < 1.215e-18            | 3.3                   |
| TCER-1-Specific DOWN         | DAF-16 -ve targets     | 49/366  | 13.39% | p < 0.003                | 1.5                   |

**2. Comparison with DAF-16 targets in *gfp-1* mutants (McCormick et al., Aging Cell. 2012, 11(2):192-202. PMID: 22081913)**

230 genes were identified as 'DAF-16-regulated' including both positive and negative targets

| RNA-Seq Gene Class              | McCormick Data         | Overlap | % of McCormick et al. | Statistical Significance | Representation Factor |
|---------------------------------|------------------------|---------|-----------------------|--------------------------|-----------------------|
| DAF-16 Targets                  | DAF-16 regulated genes | 57/230  | 25%                   | p < 1.870e-35            | 8                     |
| Joint DAF-16 and TCER-1 Targets | DAF-16 regulated genes | 28/230  | 12%                   | p < 4.820e-18            | 8.4                   |
|                                 | Overall DAF-16 overlap | 85/230  | 37%                   | p < 7.840e-55            | 8.1                   |
| TCER-1 Targets                  | DAF-16 regulated genes | 10/230  | 4%                    | p < 0.227                | 1.3                   |

**3. Comparison with DAF-16 target list in IIS mutants (Murphy et al., Nature. 2003, 424(6946):277-83. PMID: 12845331)**

| Murphy et al., Data Class                                                                | # Genes |
|------------------------------------------------------------------------------------------|---------|
| DAF-16 +ve targets (Class 1) - Upregulated (correspond to Class A genes of this study)   | 259     |
| DAF-16 -ve targets (Class 2) - Downregulated (correspond to Class B genes of this study) | 250     |

| RNA-Seq Gene Class           | Murphy Data Class            | Overlap | %      | Statistical Significance | Representation Factor |
|------------------------------|------------------------------|---------|--------|--------------------------|-----------------------|
| DAF-16-Specific UP           | DAF-16 +ve targets (Class 1) | 53/349  | 15.19% | p < 1.692e-38            | 10.3                  |
| DAF-16-Specific DOWN         | DAF-16 +ve targets (Class 1) | 0/196   |        |                          |                       |
| Joint DAF-16 and TCER-1 UP   | DAF-16 +ve targets (Class 1) | 20/123  | 16.26% | p < 1.404e-15            | 11.1                  |
| Joint DAF-16 and TCER-1 DOWN | DAF-16 +ve targets (Class 1) | 0/73    |        |                          |                       |
| Opposite DAF-16 and TCER-1   | DAF-16 +ve targets (Class 1) | 5/60    | 8.33%  | p < 0.002                | 5.7                   |
| TCER-1-Specific UP           | DAF-16 +ve targets (Class 1) | 3/213   | 1.41%  | p < 0.383                | 1                     |
| TCER-1-Specific DOWN         | DAF-16 +ve targets (Class 1) | 15/366  | 4.10%  | p < 3.581e-04            | 2.8                   |
| DAF-16-Specific UP           | DAF-16 -ve targets (Class 2) | 1/349   | 0.29%  | p < 0.040                | 0.2                   |
| DAF-16-Specific DOWN         | DAF-16 -ve targets (Class 2) | 15/196  | 7.65%  | p < 1.372e-07            | 5.4                   |
| Joint DAF-16 and TCER-1 UP   | DAF-16 -ve targets (Class 2) | 0/123   |        |                          |                       |
| Joint DAF-16 and TCER-1 DOWN | DAF-16 -ve targets (Class 2) | 14/73   | 19.18% | p < 1.647e-12            | 13.5                  |
| Opposite DAF-16 and TCER-1   | DAF-16 -ve targets (Class 2) | 5/60    | 8.33%  | p < 0.002                | 5.9                   |
| TCER-1-Specific UP           | DAF-16 -ve targets (Class 2) | 14/213  | 6.57%  | p < 2.245e-06            | 4.6                   |
| TCER-1-Specific DOWN         | DAF-16 -ve targets (Class 2) | 4/366   | 1.09%  | p < 0.403                | 0.8                   |

**4. Comparison with DAF-16 'Isoform A and F' Target List (Chen et al., Genetics. 2015 201(2): 613-629. PMID: 26219299)**

399 genes were identified as DAF-16A/F targets in the article. In actuality, the list included 450 genes because in some cases a genomic location identified in the RNA-Seq data included more than one gene. The comparisons below were performed with 450 genes.

| RNA-Seq Gene Class                  | Chen et al., Gene Class | Overlap | %      | Statistical Significance | Representation Factor |
|-------------------------------------|-------------------------|---------|--------|--------------------------|-----------------------|
| All DAF-16 targets                  | DAF-16 A/F targets      | 58/545  | 10.64% | p < 1.619e-20            | 4.2                   |
| All Joint DAF-16 and TCER-1 targets | DAF-16 A/F targets      | 62/256  | 24.22% | p < 6.465e-43            | 9.5                   |
| All TCER-1 targets                  | DAF-16 A/F targets      | 36/579  | 6.22%  | p < 8.793e-07            | 2.4                   |

**5. Comparison with genes up-regulated in *gfp-1* mutants (Steinbaugh et al., eLife. 2015; 4: e07836. PMID: 26196144)**

| Data Classes                              | # Genes |
|-------------------------------------------|---------|
| Genes upregulated in <i>gfp-1</i> mutants | 1306    |

| RNA-Seq Gene Class                  | Gene Class                     | Overlap | %      | Statistical Significance | Representation Factor |
|-------------------------------------|--------------------------------|---------|--------|--------------------------|-----------------------|
| All DAF-16 targets                  | Genes activated by GSC removal | 125/545 | 22.94% | p < 2.808e-31            | 3.1                   |
| All Joint DAF-16 and TCER-1 targets | Genes activated by GSC removal | 85/256  | 33.20% | p < 6.884e-34            | 4.5                   |
| All TCER-1 targets                  | Genes activated by GSC removal | 143/579 | 24.70% | p < 1.278e-39            | 3.3                   |

Statistical significance and representation factor were calculated using [http://nematex.org/MA/progs/overlap\\_stats.html](http://nematex.org/MA/progs/overlap_stats.html). The total number of genes in the genome was set at 19682 for the first comparison (same as Tepper et al.) and at 17611 (the number of good spots on the Kim lab full genome microarray) for the other two comparisons.
