# Supplementary material for: DAF-16 and TCER-1 Facilitate Adaptation to Germline Loss by Restoring Lipid Homeostasis and Repressing Reproductive Physiology in C. elegans
Source: PubMed Central journal article supplement (PMC4749232; doi:10.1371/journal.pgen.1005788), 2016-02-10
Supplement: pgen.1005788.s014.pdf [file pgen.1005788.s014.pdf]

**Amrit et al., Table S6: Effect of *fasn-1*, *acs-22* and *dgat-2* mutations on lifespan of wild type worms a**

| Strain              | Trial1     |                |                                   |                    |          |            |                |
|---------------------|------------|----------------|-----------------------------------|--------------------|----------|------------|----------------|
|                     | n= Obs/Tot | Mean $\pm$ SEM | % impact on <i>glp-1</i> lifespan | P vs. <i>glp-1</i> | P vs. N2 | n= Obs/Tot | Mean $\pm$ SEM |
| N2 (Wildtype)       | 76/91      | 16.7 $\pm$ 0.7 |                                   |                    |          | 39/84      | 20.0 $\pm$ 0.3 |
| <i>glp-1</i>        | 76/85      | 26.5 $\pm$ 0.5 |                                   |                    | <0.0001  | 73/76      | 24.5 $\pm$ 0.9 |
| <i>fasn-1</i>       | 62/75      | 19.1 $\pm$ 0.6 |                                   | <0.0001            | 0.13     | 63/68      | 21.4 $\pm$ 0.3 |
| <i>fasn-1;glp-1</i> | 84/88      | 18.0 $\pm$ 0.8 | -32                               | <0.0001            | 0.12     | 76/84      | 20.2 $\pm$ 0.8 |
| <i>dgat-2</i>       | 75/88      | 22.6 $\pm$ 0.6 |                                   | <0.0001            | <0.0001  | 59/82      | 23.8 $\pm$ 0.2 |
| <i>dgat-2;glp-1</i> | 52/61      | 28.5 $\pm$ 1.0 | +7                                | 0.64               | <0.0001  | 79/86      | 28.8 $\pm$ 0.3 |
| <hr/>               |            |                |                                   |                    |          |            |                |
| N2 (Wildtype)       | 69/100     | 17.0 $\pm$ 0.7 |                                   |                    |          | 57/74      | 19.3 $\pm$ 0.5 |
| <i>glp-1</i>        | 92/96      | 21.0 $\pm$ 0.9 |                                   |                    | <0.0001  | 105/105    | 21.6 $\pm$ 0.9 |
| <i>acs-22</i>       | 72/83      | 19.1 $\pm$ 0.5 |                                   | <0.0006            | 0.1      | 83/102     | 18.8 $\pm$ 0.3 |
| <i>acs-22;glp-1</i> | 97/103     | 23.6 $\pm$ 0.6 | +12                               | 0.87               | <0.0001  | 94/110     | 26.0 $\pm$ 0.2 |

| and <i>glp-1</i> mutants          |                 |                    |
|-----------------------------------|-----------------|--------------------|
| Trial 2                           |                 |                    |
| % impact on <i>glp-1</i> lifespan | P vs. <i>N2</i> | P vs. <i>glp-1</i> |
|                                   | 0.04            |                    |
|                                   | 0.19            | 0.004              |
| -17.5                             | <0.0001         | 0.18               |
|                                   | 0.0001          | 0.05               |
| +17.5                             | <0.0001         | 0.12               |
|                                   | 0.007           |                    |
|                                   | 0.19            | 0.004              |
| +20.3                             | <0.0001         | 0.18               |
