# Supplementary material for: DAF-16 and TCER-1 Facilitate Adaptation to Germline Loss by Restoring Lipid Homeostasis and Repressing Reproductive Physiology in C. elegans
Source: PubMed Central journal article supplement (PMC4749232; doi:10.1371/journal.pgen.1005788), 2016-02-10
Supplement: pgen.1005788.s015.pdf [file pgen.1005788.s015.pdf]

Amrit et al., Table S7: Effect of RNAi inactivation of lipid-metabolic genes on extended lifespan of *gfp-1* mutants.

| Gene Name (Cosmid)            | RNA-Seq Class      | Trial #1      |              |                   |               | Trial #2      |              |                   |               | Trial #3      |              |                   |               | Trial #4        |                              |                   |                    |
|-------------------------------|--------------------|---------------|--------------|-------------------|---------------|---------------|--------------|-------------------|---------------|---------------|--------------|-------------------|---------------|-----------------|------------------------------|-------------------|--------------------|
|                               |                    | n = obs/total | Mean +/- SEM | % Lifespan impact | P (vs pAD-12) | n = obs/total | Mean +/- SEM | % Lifespan impact | P (vs pAD-12) | n = obs/total | Mean +/- SEM | % Lifespan impact | P (vs pAD-12) | n = obs/total   | Mean +/- SEM                 | % Lifespan impact | P (vs pAD-12)      |
| pAD-12 (Empty control vector) |                    | 63/83         | 23.2+/-0.3   |                   |               | 121/127       | 26.71+/-0.85 |                   |               | 77/91         | 23.23+/-0.86 |                   |               | 49/50           | 27.99+/-1.39                 |                   |                    |
| <i>daf-16 (R13H8.1)</i>       |                    | 79/79         | 15.2+/-0.3   | -34.4827586       | <0.0001       | 117/117       | 17.32+/-0.57 | -35               | <0.0001       | 83/110        | 15.77+/-0.36 | -32               | <0.0001       | 74/78           | 14.81+/-0.38                 | -47               | <0.0001            |
| <i>tcer-1 (ZK1127.9)</i>      |                    | 98/103        | 18.3+/-0.9   | -21.1206897       | <0.0001       | 93/95         | 22.05+/-0.85 | -17               | <0.0001       | 75/85         | 20.08+/-0.77 | -14               | <0.0001       | 76/78           | 19.07+/-0.67                 | -32               | <0.0001            |
| <i>pod-2 (W09B6.1)</i>        | DAF-16-Specific UP | 86/94         | 17.3+/-0     | -25.4310345       | <0.0001       | 104/104       | 24.96+/-1.13 | -7                | 0.812         | 83/91         | 22.34+/-0.90 | -4                | 0.5163        | 64/65<br>^61/63 | 20.68+/-1.00<br>19.81+/-0.87 | -26<br>-29        | <0.0001<br><0.0001 |
| <i>mlcd-1 (F35G12.1)</i>      | DAF-16-Specific UP | 42/43         | 15.8+/-0     | -31.8965517       | <0.0001       | 91/97         | 26.71+/-0.86 | 0                 | 0.741         | 53/75         | 20.67+/-1.12 | -11               | 0.0575        |                 |                              |                   |                    |
| <i>fasn-1 (F32H2.5)</i>       | NR*                | 56/56         | 17.1+/-0.2   | -26.2931034       | <0.0001       | 140/140       | 20.88+/-0.69 | -22               | <0.0001       | 59/85         | 18.70+/-0.70 | -20               | 0.0001        | 69/72           | 18.5+/-0.46                  | -34               | <0.0001            |
| <i>dgat-2 (F59A1.10)</i>      | TCER-1-Specific UP | 71/80         | 18.5+/-0.7   | -20.2586207       | <0.0001       | 58/61         | 20.41+/-1.18 | -24               | <0.0001       | 86/93         | 23.31+/-0.96 | 0                 | <0.0001       | 62/65           | 23.24+/-1.03                 | -17               | 0.0001             |
| Y53G8B.2                      | Joint UP           | 59/71         | 20.7+/-0.5   | -10.7758621       | 0.02          | 140/140       | 23.33+/-0.85 | -13               | 0.0186        | 84/90         | 23.02+/-1.12 | -1                | 0.6914        | 69/75           | 24.28+/-0.93                 | -13               | 0.0028             |
| <i>acs-22 (D1009.1)</i>       | DAF-16-Specific UP | 123/123       | 19.7+/-1.3   | -15.0862069       | 0.006         | 92/92         | 24.62+/-1.00 | -8                | 0.1533        | 86/89         | 22.52+/-0.83 | -3                | 0.2185        |                 |                              |                   |                    |
| K07B1.4                       | Joint UP           | 97/97         | 19.9+/-1     | -14.2241379       | 0.0009        | 156/156       | 21.81+/-0.75 | -18               | <0.0001       | 72/83         | 22.61+/-1.05 | -3                | 0.7701        |                 |                              |                   |                    |
| <i>lipl-1 (F54F3.3)</i>       | Opposite           | 89/89         | 20.5+/-0.8   | -11.637931        | 0.01          | 145/151       | 20.76+/-0.86 | -22               | 0.0002        |               |              |                   |               |                 |                              |                   |                    |
| <i>lipl-2 (F46B6.8)</i>       | Opposite           | 63/74         | 18.9+/-0.6   | -18.5344828       | 0.0001        | 122/127       | 22.69+/-0.95 | -15               | 0.0351        |               |              |                   |               |                 |                              |                   |                    |
| <i>lipl-5 (ZK6.7)</i>         | Joint UP           | 78/79         | 20.2+/-0.5   | -12.9310345       | 0.003         | 180/180       | 21.17+/-0.77 | -21               | 0.0005        |               |              |                   |               | 71/74           | 22.84+/-1.11                 | -18               | 0.0091             |
| <i>lips-10 (F14E5.5)</i>      | TCER-1-Specific UP | 94/98         | 21+/-0.2     | -9.48275862       | 0.01          | 89/90         | 21.72+/-0.98 | -19               | 0.0001        |               |              |                   |               |                 |                              |                   |                    |
| <i>lips-14 (H17B01.3)</i>     | TCER-1-Specific UP | 83/86         | 18.5+/-0.4   | -20.2586207       | <0.0001       | 81/81         | 22.25+/-1.11 | -17               | 0.0040        |               |              |                   |               |                 |                              |                   |                    |
| <i>atgl-1 (C05D11.7)</i>      | DAF-16-Specific UP | 75/82         | 15.7+/-0     | -32.3275862       | <0.0001       | 124/128       | 25.71+/-1.12 | -4                | 0.1528        | 71/88         | 23.83+/-1.09 | 3                 | 0.4526        | 58/60           | 21.52+/-1.01                 | -23               | <0.0001            |

\*Not represented      ^ Gene tested twice in the same experiment
