# Supplementary material for: DAF-16 and TCER-1 Facilitate Adaptation to Germline Loss by Restoring Lipid Homeostasis and Repressing Reproductive Physiology in C. elegans
Source: PubMed Central journal article supplement (PMC4749232; doi:10.1371/journal.pgen.1005788), 2016-02-10
Supplement: pgen.1005788.s016.pdf [file pgen.1005788.s016.pdf]

**Amrit et al., Table S8: Effect of RNAi inactivation of TCER-1-Specific DOWN genes on lifespan of wild-type surrogate strain *fer-15;fem-1***

| Gene Name<br>(Cosmid)        | Trial #1         |              |                           |                 | Trial #2         |               |                           |                 | Trial #3         |              |                           |                  |
|------------------------------|------------------|--------------|---------------------------|-----------------|------------------|---------------|---------------------------|-----------------|------------------|--------------|---------------------------|------------------|
|                              | n =<br>obs/total | Mean +/- SEM | %<br>Lifespan<br>Increase | P (vs<br>pAD12) | n =<br>obs/total | Mean +/- SEM  | %<br>Lifespan<br>Increase | P (vs<br>pAD12) | n =<br>obs/total | Mean +/- SEM | %<br>Lifespan<br>Increase | P (vs<br>pAD-12) |
| pAD12 (Empty control vector) | 57/80            | 14.1 +/- 0.6 |                           |                 | 76/76            | 12.6 +/- 0.3  |                           |                 | 31/40            | 14.4 +/- 0.7 |                           |                  |
| <i>daf-2 (Y55D5A.5)</i>      | 73/76            | 22.1 +/- 0.9 | 56                        | <0.0001         | 80/84            | 16.4 +/- 0.6  |                           | <0.0001         | 56/60            | 19.8 +/- 1.0 | 38                        | 0.01             |
| F56D3.1                      | 75/77            | 16.0 +/- 0.6 | 13                        | 0.03            | 69/72            | 13.8 +/- 0.5  | 10                        | 0.05            |                  |              |                           |                  |
| <i>gst-24 (F37B1.1)</i>      | 70/70            | 15.9 +/- 0.5 | 13                        | 0.03            | 60/60            | 14.18 +/- 0.5 | 12                        | 0.01            |                  |              |                           |                  |
| <i>numr-1 (F08F8.5)</i>      | 75/87            | 16.6 +/- 0.4 | 18                        | 0.003           | 66/67            | 14.3 +/- 0.4  | 14                        | 0.002           |                  |              |                           |                  |
| <i>col-117 (T28C6.4)</i>     | 89/89            | 16.1 +/- 0.4 | 14                        | 0.01            | 61/62            | 15.2 +/- 0.5  | 21                        | <0.0001         |                  |              |                           |                  |
| <i>col-3 (T28C6.6)</i>       | 76/78            | 16.0 +/- 0.6 | 13                        | 0.03            | 90/92            | 13.9 +/- 0.3  | 10                        | 0.04            |                  |              |                           |                  |
| <i>dhs-14 (R05D8.8)</i>      | 77/79            | 16.5 +/- 0.5 | 17                        | 0.005           | 47/49            | 13.1 +/- 0.5  | 5                         | 0.78            |                  |              |                           |                  |
| <i>ilys-3 (C45G7.3)</i>      | 87/88            | 14.9 +/- 0.4 | 6                         | 0.39            | 73/74            | 13.9 +/- 0.4  | 10                        | 0.03            | 69/71            | 13.4 +/- 0.5 | -7                        | 0.05             |
| <i>spp-18 (F27C8.4)</i>      | 71/74            | 16.0 +/- 0.6 | 13                        | 0.03            | 53/54            | 13.2 +/- 0.4  | 5                         | 1               | 49/50            | 14.5 +/- 0.8 | 1                         | 0.69             |
| <i>lys-4 (F58B3.1)</i>       | 78/83            | 17.2 +/- 0.5 | 22                        | 0.0003          | 78/80            | 14.5 +/- 0.4  | 15                        | 0.003           | 45/52            | 16.7 +/- 0.7 | 16                        | 0.32             |
| pAD12 (Empty control vector) | 66/74            | 19.2 +/- 0.4 |                           |                 |                  |               |                           |                 |                  |              |                           |                  |
| <i>daf-2 (Y55D5A.5)</i>      | 71/75            | 27.1 +/- 0.6 | 41                        | <0.0001         |                  |               |                           |                 |                  |              |                           |                  |
| <i>pcf-11 (R144.2)</i>       | 39/43            | 12.1 +/- 0.3 | -37                       | <0.0001         | 64/67            | 9.6 +/- 0.3   | -23                       | <0.0001         | 69/69            | 7.1 +/- 0.1  | -51                       | <0.0001          |
| <i>ilys-10 (F17E9.11)</i>    | 20/9             | 20.9 +/- 0.4 | 9                         | 0.0008          | 79/84            | 13.7 +/- 0.4  | 9                         | 0.03            | 69/70            | 15.0 +/- 0.5 | 4                         | 0.45             |
| <i>ilys-2 (C45G7.2)</i>      | 59/60            | 19.8 +/- 0.4 | 3                         | 0.08            | 70/70            | 12.2 +/- 0.6  | -3                        | 0.75            | 62/64            | 12.7 +/- 0.6 | -12                       | 0.04             |
| Y49G5A.1                     | 46/75            | 21.1 +/- 0.4 | 10                        | 0.002           | 59/59            | 12.3 +/- 0.6  | -2                        | 1               | 46/49            | 15.6 +/- 0.7 | 9                         | 0.8              |
| F41F3.3                      | 75/75            | 19.9 +/- 0.4 | 4                         | 0.18            | 61/61            | 10.8 +/- 0.5  | -14                       | 0.11            | 55/56            | 13.9 +/- 0.5 | -3                        | 0.2              |
| Y41C4A.11                    | 75/75            | 19.3 +/- 0.3 | ne                        | 0.43            | 46/46            | 13.2 +/- 0.6  | 5                         | 0.13            | 60/60            | 13.3 +/- 0.7 | -8                        | 0.07             |
| <i>hel-1 (C26D10.2)</i>      | 72/72            | 18.4 +/- 0.4 | -4                        | 0.3             | 77/81            | 12.1 +/- 0.5  | -4                        | 1               | 55/56            | 14.7 +/- 0.7 | 2                         | 0.39             |
| T27A1.2                      | 56/75            | 19.3 +/- 0.3 | ne                        | 0.06            | 48/49            | 13.7 +/- 0.5  | 9                         | 0.11            |                  |              |                           |                  |
| F57H12.6                     | 51/60            | 20.9 +/- 0.5 | 9                         | 0.01            | 79/80            | 13.8 +/- 0.4  | 10                        | 0.006           |                  |              |                           |                  |
| <i>col-81 (F38A3.10)</i>     | 60/60            | 21.8 +/- 0.4 | 13                        | <0.0001         | 72/73            | 14.5 +/- 0.4  | 15                        | 0.0001          |                  |              |                           |                  |

ne: no effect
