# Supplementary material for: DAF-16 and TCER-1 Facilitate Adaptation to Germline Loss by Restoring Lipid Homeostasis and Repressing Reproductive Physiology in C. elegans
Source: PubMed Central journal article supplement (PMC4749232; doi:10.1371/journal.pgen.1005788), 2016-02-10
Supplement: pgen.1005788.s017.pdf [file pgen.1005788.s017.pdf]

| Amrit et al., Table S9: Effect of mutations in TCER-1-Specific DOWN genes on lifespan |                       |                   |                 |                                |           |                   |              |                                |           |
|---------------------------------------------------------------------------------------|-----------------------|-------------------|-----------------|--------------------------------|-----------|-------------------|--------------|--------------------------------|-----------|
| Strain                                                                                | Gene                  | Trial 1           |                 |                                |           | Trial 2           |              |                                |           |
|                                                                                       |                       | n = obs/<br>total | Mean +/-<br>SEM | % Change<br>vs. N2<br>lifespan | p (vs N2) | n = obs/<br>total | Mean +/- SEM | % Change<br>vs. N2<br>lifespan | p (vs N2) |
| <b>N2</b>                                                                             | <b>Control</b>        | 68/79             | 20.2 +/- 0.4    |                                |           | 67/77             | 17.7 +/- 0.4 |                                |           |
| <b>RB2248</b>                                                                         | <b>gst-24(ok2042)</b> | 52/75             | 23.6 +/- 0.7    | 16.6                           | 0.0001    | 71/89             | 18.7 +/- 0.7 | 5.9                            | 0.0022    |
| <b>RB2200</b>                                                                         | <b>gst-24(ok2980)</b> | 78/94             | 21.4 +/- 0.4    | 5.6                            | 0.1054    | 61/70             | 16.5 +/- 0.5 | -6.7                           | 0.1       |
| <b>RB1749</b>                                                                         | <b>numr-1(ok2239)</b> | 51/79             | 22.4 +/- 0.5    | 10.7                           | 0.0007    | 57/79             | 18.1 +/- 0.1 | 2.2                            | 0.1       |
| <b>OH4240*</b>                                                                        | <b>lin-17(ot260)</b>  | 13/66             | 19.5 +/- 0.2    | -3.7                           | 0.7623    | 82/92             | 8.34 +/- 0.3 | -52.8                          | <0.0001   |
| <b>RB2283</b>                                                                         | <b>lys-4(ok3106)</b>  | 66/93             | 21.8 +/- 0.5    | 7.9                            | 0.0203    | 71/76             | 16.8 +/- 0.6 | -4.6                           | 0.78      |
| <b>OH4247**</b>                                                                       | <b>dopy-6(ot263)</b>  | 45/100            | 26.5 +/- 1.3    | 30.8                           | 1.30E-06  | 76/107            | 20.4 +/- 0.7 | 15.4                           | 0.0001    |

Complete genotypes: \**lin-17(ot260) l*; *vtIs1 [dat-1p::GFP + rol-6]* \*\* *vtIs1[dat-1p::GFP + rol-6] V*; *dopy-6(ot263) X*.
