# Supplementary material for: DAF-16 and TCER-1 Facilitate Adaptation to Germline Loss by Restoring Lipid Homeostasis and Repressing Reproductive Physiology in C. elegans
Source: PubMed Central journal article supplement (PMC4749232; doi:10.1371/journal.pgen.1005788), 2016-02-10
Supplement: pgen.1005788.s018.pdf [file pgen.1005788.s018.pdf]

Amrit et al., Table S10: Effect of RNAi inactivation of lipid-metabolic genes on lifespan of wild-type worms

| Wb Gene ID     | Gene Name      | Trial 1           |              |                            |                 | Trial 2           |              |                            |                 |
|----------------|----------------|-------------------|--------------|----------------------------|-----------------|-------------------|--------------|----------------------------|-----------------|
|                |                | n = obs/<br>total | Mean +/- SEM | % Change in<br>N2 Lifespan | p (vs<br>pAD12) | n = obs/<br>total | Mean +/- SEM | % Change in<br>N2 Lifespan | p (vs<br>pAD12) |
| Control Vector | pAD12          | 63/77             | 16.6 +/- 0.5 |                            |                 | 73/80             | 19.9 +/- 0.6 |                            |                 |
| WBGene00000912 | <i>daf-16</i>  | 71/72             | 12.8 +/- 0.2 | -22.8                      | <0.0001         | 92/100            | 15.1 +/- 0.3 | -24.3                      | <0.0001         |
| WBGene00022855 | <i>tcer-1</i>  | 77/85             | 15.8 +/- 0.3 | -4.6                       | 0.0061          | 80/90             | 17.2 +/- 0.5 | -13.5                      | 0.0005          |
| WBGene00004076 | <i>pod-2</i>   | 60/105            | 10 +/- 0.1   | -39.7                      | <0.0001         | 82/85             | 11.9 +/- 0.2 | -40.2                      | <0.0001         |
| WBGene00009439 | <i>mlcd-1</i>  | 65/74             | 16.3 +/- 0.4 | -1.6                       | 0.4615          | 95/100            | 16.8 +/- 0.4 | -15.8                      | 0.0001          |
| WBGene00009342 | <i>fasn-1</i>  | 79/83             | 7.95 +/- .03 | -52.1                      | <0.0001         | 59/90             | 15.8 +/- 0.3 | -20.9                      | <0.0001         |
| WBGene00010296 | <i>dgat-2</i>  | 47/67             | 15.7 +/- 0.3 | -5.2                       | 0.0159          | 72/85             | 18.5 +/- 0.5 | -7.2                       | <0.0001         |
| WBGene00021818 | Y53G8B.2       | 78/102            | 14.3 +/- 0.2 | -13.3                      | <0.0001         | 61/88             | 17.6 +/- 0.4 | -11.6                      | 0.0008          |
| WBGene00017012 | <i>acs-22</i>  | 71/85             | 14.5 +/- 0.2 | -12.2                      | <0.0001         | 81/85             | 15.9 +/- 0.5 | -20                        | <0.0001         |
| WBGene00019464 | K07B1.4        | 61/84             | 15.1 +/- 0.3 | -8.7                       | 0.0077          | 65/98             | 18.3 +/- 0.4 | -8.1                       | 0.0123          |
| WBGene00010062 | <i>lipl-1</i>  | 69/76             | 14.4 +/- 0.2 | -12.7                      | <0.0001         | 58/77             | 17.8 +/- 0.5 | -10.8                      | 0.0032          |
| WBGene00009773 | <i>lipl-2</i>  | 75/79             | 14.4 +/- 0.3 | -12.8                      | <0.0001         | 62/77             | 18 +/- 0.4   | -9.9                       | 0.0046          |
| WBGene00022642 | <i>lipl-5</i>  | 76/99             | 14.8 +/- 0.3 | -10.5                      | 0.0001          | 64/86             | 17.8 +/- 0.4 | -10.8                      | 0.0013          |
| WBGene00008803 | <i>lips-10</i> | 61/74             | 15.6 +/- 0.4 | -5.9                       | 0.0095          | 53/69             | 19.1 +/- 0.5 | -4.1                       | 0.1853          |
| WBGene00019208 | <i>lips-14</i> | 59/83             | 15.1 +/- 0.3 | -8.6                       | 0.001           | 75/96             | 16.8 +/- 0.4 | -15.7                      | <0.0001         |
| WBGene00015484 | <i>atgl-1</i>  | 62/76             | 15.6 +/- 0.4 | -5.6                       | 0.0329          | 89/95             | 16.3 +/- 0.5 | -18.2                      | 0.0001          |
