# Supplementary material for: DAF-16 and TCER-1 Facilitate Adaptation to Germline Loss by Restoring Lipid Homeostasis and Repressing Reproductive Physiology in C. elegans
Source: PubMed Central journal article supplement (PMC4749232; doi:10.1371/journal.pgen.1005788), 2016-02-10
Supplement: pgen.1005788.s019.pdf [file pgen.1005788.s019.pdf]

Amrit et al., Table S11: Human homologs and orthologs of lipid-metabolic genes identified as DAF-16 and/or TCER-1 targets through RNA-Seq

| #  | Wormbase Gene ID | Worm Gene      | Human Ortholog                                                                                                                                                             | Ensemble ID                                                                                                                             | Disease(s) linked to gene dysfunction                                                                                                                   |
|----|------------------|----------------|----------------------------------------------------------------------------------------------------------------------------------------------------------------------------|-----------------------------------------------------------------------------------------------------------------------------------------|---------------------------------------------------------------------------------------------------------------------------------------------------------|
| 1  | WBGene00004076   | <i>pod-2</i>   | ACACA: Acetyl-CoA carboxylase alpha<br>ACACB: Acetyl-CoA carboxylase beta                                                                                                  | ENSG00000278540;<br>ENSG00000076555                                                                                                     | Fatty liver, insulin resistance [1,2]                                                                                                                   |
| 2  | WBGene00009439   | <i>mlcd-1</i>  | MLYCD: Malonyl-CoA decarboxylase                                                                                                                                           | ENSG00000260300;<br>ENSG00000103150                                                                                                     | Malonyl-CoA decarboxylase deficiency, malonic aciduria, cardiomyopathy [3,4]                                                                            |
| 3  | WBGene00009342   | <i>fasn-1</i>  | FASN: Fatty acid synthase                                                                                                                                                  | ENSG00000169710                                                                                                                         | Fatty liver, breast cancer, prostate cancer, insulin resistance [5]                                                                                     |
| 4  | WBGene00010408   | <i>mboa-2</i>  | DGAT1: Diacylglycerol O-acyltransferase 1                                                                                                                                  | ENSG00000185000                                                                                                                         | Congenital diarrheal disorder, insulin resistance [6]                                                                                                   |
| 5  | WBGene00010296   | <i>dgat-2</i>  | DGAT2: Diacylglycerol O-acyltransferase 2                                                                                                                                  | ENSG00000062282                                                                                                                         | Alcoholic fatty liver disease [7]                                                                                                                       |
| 6  | WBGene00017012   | <i>acs-22</i>  | SLC27A4/ACSVL4/FATP4                                                                                                                                                       | ENSG00000130304;<br>ENSG00000167114                                                                                                     | Ichthyosis prematurity syndrome, insulin resistance [8]                                                                                                 |
| 7  | WBGene00021818   | Y53G8B.2       | DGAT2, DGAT2L6, AWAT1, AWAT2,<br>MOGAT1, MOGAT2 and MOGAT3                                                                                                                 | ENSG00000166391;<br>ENSG00000184210;<br>ENSG00000204195;<br>ENSG00000062282;<br>ENSG00000106384;<br>ENSG00000147160;<br>ENSG00000124003 | Alcoholic fatty liver disease [7]                                                                                                                       |
| 8  | WBGene00019464   | K07B1.4        |                                                                                                                                                                            |                                                                                                                                         |                                                                                                                                                         |
| 9  | WBGene00001397   | <i>fat-5</i>   | SCD, SCD5                                                                                                                                                                  | ENSG00000099194;<br>ENSG00000145284                                                                                                     | Spondylocostal dysostosis, fatty liver disease, cvd, metabolic disorder, neoplastic transformation [9,10]                                               |
| 10 | WBGene00001398   | <i>fat-6</i>   |                                                                                                                                                                            |                                                                                                                                         |                                                                                                                                                         |
| 11 | WBGene00001399   | <i>fat-7</i>   |                                                                                                                                                                            |                                                                                                                                         |                                                                                                                                                         |
| 12 | WBGene00010062   | <i>lipl-1</i>  | Gastric triacylglycerol lipase isoform 1, lipase family members A, M, J, K and N (LIPA, LIPM, LIPJ, LIPK and LIPN, respectively)                                           | ENSG00000173239;<br>ENSG00000107798;<br>ENSG00000204020;<br>ENSG00000204021;<br>ENSG00000182333;                                        | Wolman disease, cholesteryl ester storage disease, lysosomal storage diseases, autosomal recessive congenital ichthyosis, atherosclerosis [11,12,13,14] |
| 13 | WBGene00009773   | <i>lipl-2</i>  |                                                                                                                                                                            |                                                                                                                                         |                                                                                                                                                         |
| 14 | WBGene00022642   | <i>lipl-5</i>  |                                                                                                                                                                            |                                                                                                                                         |                                                                                                                                                         |
| 15 | WBGene00015484   | <i>atgl-1</i>  | PNPLA1: Patatin-like phospholipase domain containing 1<br>PNPLA2: Patatin-like phospholipase domain containing 2<br>PNPLA3: Patatin-like phospholipase domain containing 3 | ENSG00000100341;<br>ENSG00000100344;<br>ENSG00000177666;<br>ENSG00000180316                                                             | neutral lipid storage disease, Nonalcoholic fatty liver disease (NAFLD), familial hyperlipidemia [15,16]                                                |
| 16 | WBGene00016716   | <i>acs-17</i>  | ACSL4: Acyl CoA synthetase                                                                                                                                                 | ENSG00000123983;<br>ENSG00000068366                                                                                                     | Alport Syndrome, hereditary elliptocytosis, mental retardation, adenocarcinoma [17,18]                                                                  |
| 17 | WBGene00011122   | <i>cpt-2</i>   | CPT2: Carnitine palmitoyltransferase II                                                                                                                                    | ENSG00000157184                                                                                                                         | Carnitine palmitoyltransferase II (CPT II) deficiency, infection-induced acute encephalopathy, metabolic disorder [19]                                  |
| 18 | WBGene00017874   | <i>acdh-9</i>  | ACAD8: Acyl-CoA dehydrogenase family, member 8                                                                                                                             | ENSG00000151498                                                                                                                         | isobutyryl-CoA dehydrogenase (IBD) deficiency [20]                                                                                                      |
| 19 | WBGene00001156   | <i>ech-7</i>   | ECHS1: Short-chain enoyl-CoA hydratase                                                                                                                                     | ENSG00000127884                                                                                                                         | Short-chain enoyl-CoA hydratase 1 deficiency (fatal neurodegenerative disorder), Leigh syndrome [21,22]                                                 |
| 20 | WBGene00020347   | <i>ech-1.2</i> | HADHA: Hydroxyacyl-CoA Dehydrogenase/3-Ketoacyl-CoA Thiolase/Enoyl-CoA Hydratase (Trifunctional Protein), Alpha Subunit                                                    | ENSG00000084754                                                                                                                         | Mitochondrial trifunctional protein (MTP) deficiency, LCHAD deficiency, HELLP syndrome, reye-like syndrome, fatty liver, cardiomyopathy [23,24]         |
| 21 | WBGene00008564   | <i>acox-1</i>  | ACOX1: Peroxisomal straight-chain acyl-CoA oxidase 1                                                                                                                       | ENSG00000161533;<br>ENSG00000168306                                                                                                     | Peroxisomal acyl-CoA oxidase deficiency, Pseudoneonatal adrenoleukodystrophy [25,26]                                                                    |
| 22 | WBGene00008565   | F08A8.2        | ACOX2: Peroxisomal acyl-coenzyme A oxidase 2                                                                                                                               |                                                                                                                                         |                                                                                                                                                         |
| 23 | WBGene00008566   | F08A8.3        |                                                                                                                                                                            |                                                                                                                                         |                                                                                                                                                         |
| 24 | WBGene00008567   | F08A8.4        |                                                                                                                                                                            |                                                                                                                                         |                                                                                                                                                         |
| 25 | WBGene00008167   | C48B4.1        |                                                                                                                                                                            |                                                                                                                                         |                                                                                                                                                         |
| 26 | WBGene00009952   | <i>aca-2</i>   | ACAA2: Acetyl-CoA acetyltransferase                                                                                                                                        | ENSG00000167315                                                                                                                         | Beta ketothiolase deficiency; Diabetes Mellitus, Type 2; osteoarthritis [27,28,29]                                                                      |
| 27 | WBGene00019978   | <i>hacd-1</i>  | HADH: Hydroxyacyl-coenzyme A dehydrogenase                                                                                                                                 |                                                                                                                                         | Hyperinsulinism, hypoglycemia [30]                                                                                                                      |
| 28 | WBGene00001394   | <i>fat-2</i>   |                                                                                                                                                                            |                                                                                                                                         |                                                                                                                                                         |
| 29 | WBGene00009221   | <i>acs-2</i>   | Similar to ACSF2: Acyl-CoA synthetase 2                                                                                                                                    |                                                                                                                                         |                                                                                                                                                         |
| 30 | WBGene00001239   | <i>elo-1</i>   | Similar to ELOVL fatty acid elongase                                                                                                                                       |                                                                                                                                         |                                                                                                                                                         |
| 31 | WBGene00001240   | <i>elo-2</i>   |                                                                                                                                                                            |                                                                                                                                         |                                                                                                                                                         |
| 32 | WBGene00012860   | <i>acdh-11</i> | Highly similar to very-long-chain specific acyl-CoA dehydrogenase                                                                                                          |                                                                                                                                         |                                                                                                                                                         |
| 33 | WBGene00008803   | <i>lips-10</i> |                                                                                                                                                                            |                                                                                                                                         |                                                                                                                                                         |
| 34 | WBGene00019208   | <i>lips-14</i> |                                                                                                                                                                            |                                                                                                                                         |                                                                                                                                                         |
