# Supplementary material for: DAF-16 and TCER-1 Facilitate Adaptation to Germline Loss by Restoring Lipid Homeostasis and Repressing Reproductive Physiology in C. elegans
Source: PubMed Central journal article supplement (PMC4749232; doi:10.1371/journal.pgen.1005788), 2016-02-10
Supplement: pgen.1005788.s020.pdf [file pgen.1005788.s020.pdf]

**Amrit et al., Table S12: Primers used in this study for Q-PCR assays**

| Gene           | Cosmid    | Primer Sequence |                                 | Gene           | Cosmid    | Primer Sequence |                                |
|----------------|-----------|-----------------|---------------------------------|----------------|-----------|-----------------|--------------------------------|
| <i>ech-7</i>   | Y105E8A.4 | Forward Primer  | 5' GAGAATGACTATTTACGAACTGG 3'   | <i>elo-1</i>   | F56H11.4  | Forward Primer  | 5' GTTACTATTGAGGCTTCAATCCTG 3' |
|                |           | Reverse Primer  | 5' CTAAGGCAAATCCGTTGACAG 3'     |                |           | Reverse Primer  | 5' TTGGAATGGTTGACGATTACG 3'    |
| <i>elo-2</i>   | F11E6.5   | Forward Primer  | 5' TCACTGTTCTCGGAATCG 3'        | <i>acs-22</i>  | D1009.1   | Forward Primer  | 5' TTGAATCAGGTGAAACAGCA 3'     |
|                |           | Reverse Primer  | 5' AGTAGGAAGCGACAAACCC 3'       |                |           | Reverse Primer  | 5' CAATTCTTGATACGTCAACTGC 3'   |
| <i>fat-5</i>   | W06D12.3  | Forward Primer  | 5' TCTACACATTGGAGCCCTG 3'       | <i>atgl-1</i>  | C05D11.7  | Forward Primer  | 5' GATCGACCGATGATTTATCGAG 3'   |
|                |           | Reverse Primer  | 5' CAGGAGGAATACCCATCCA 3'       |                |           | Reverse Primer  | 5' GAGCCAATCCACATTTGGT 3'      |
| <i>pod-2</i>   | W09B6.1   | Forward Primer  | 5' GAGCAGTATTACGAGACGC 3'       | <i>fasn-1</i>  | F32H2.5   | Forward Primer  | 5' GGATAAATACTGGAGAAGGATCG 3'  |
|                |           | Reverse Primer  | 5' GAGCTGCTGTTTCATATCGT 3'      |                |           | Reverse Primer  | 5' ATGTTGTCCGAAGACTGAG 3'      |
| <i>acs-2</i>   | F28F8.2   | Forward Primer  | 5' TCCGGATAAAGGAGTTCTGTG 3'     | <i>lipl-1</i>  | F54F3.3   | Forward Primer  | 5' GGACTTAAAGTTGAAGCTGGAG 3'   |
|                |           | Reverse Primer  | 5' ATTTGACGACGTCATGGT 3'        |                |           | Reverse Primer  | 5' AACACGAGTTGCGTTAAGC 3'      |
| <i>mlcd-1</i>  | F35G12.1  | Forward Primer  | 5' ATTCAGTTGCAAACCTCCAC 3'      | <i>lipl-2</i>  | F46B6.8   | Forward Primer  | 5' GTTACATGGCCAAATGGGA 3'      |
|                |           | Reverse Primer  | 5' TCCCTCTATGACTCGTATCTC 3'     |                |           | Reverse Primer  | 5' AAACGAAAGCTGCACTCTG 3'      |
|                | F53A2.7   | Forward Primer  | 5' ATCTTCGAGGTAATGAGGC 3'       | <i>lipl-5</i>  | ZK6.7     | Forward Primer  | 5' CAAGAAGTTCTTCGCGCTG 3'      |
|                |           | Reverse Primer  | 5' CCACCATTGACATTCAGCT 3'       |                |           | Reverse Primer  | 5' CGAACCATCCATCAAACCTCC 3'    |
| <i>dgat-2</i>  | F59A1.10  | Forward Primer  | 5' TCGGATATCATCCTCATGGA 3'      | <i>lips-10</i> | F14E5.5   | Forward Primer  | 5' CGATTATGTGTTGAAGTTTCG 3'    |
|                |           | Reverse Primer  | 5' ATGCCCTTTGAACACTTGCT 3'      |                |           | Reverse Primer  | 5' GAGCAAGCAATGATGTTTACTG 3'   |
| <i>cpt-2</i>   | R07H5.2   | Forward Primer  | 5' GCAAGATGGATTCGGTATTGG 3'     | <i>lips-14</i> | H17B01.3  | Forward Primer  | 5' TTGGGCTAGGAATAGCCAG 3'      |
|                |           | Reverse Primer  | 5' TCACGTTTCGACTTATTGCTC 3'     |                |           | Reverse Primer  | 5' TGAGTAGACGATAGACTTGGTG 3'   |
| <i>acdh-11</i> | Y45F3A.3  | Forward Primer  | 5' AATACAGCCACGCAAAGAC 3'       | <i>mboa-2</i>  | H19N07.4  | Forward Primer  | 5' GAAATGAGAGGACCTTGCG 3'      |
|                |           | Reverse Primer  | 5' CGAGAATTGGGTCATCTTTATAAGG 3' |                |           | Reverse Primer  | 5' GAAATTTGTCCATCCAGAACTC 3'   |
| <i>acs-17</i>  | C46F4.2   | Forward Primer  | 5' TATGCTCAGGTTGACAAACG 3'      | <i>nhr-49</i>  | K10C3.6   | Forward Primer  | 5' TTGGCAGAGGTGGATTCTC 3'      |
|                |           | Reverse Primer  | 5' AATAATTGGCTCCTTCTCCTG 3'     |                |           | Reverse Primer  | 5' CTGTAAAGAGACCGGAGCC 3'      |
| <i>hacd-1</i>  | R09B5.6   | Forward Primer  | 5' ATACTGATATCCGTCGCTG 3'       |                | Y45F10D.4 | Forward Primer  | 5' TTCACTGTTCAATGCTCGC 3'      |
|                |           | Reverse Primer  | 5' GGAAGATGTCAAGTTTCAGATCC 3'   |                |           | Reverse Primer  | 5' CTTAGGCCTTCTTAGTCTGCT 3'    |
|                | Y53G8B.2  | Forward Primer  | 5' TAGCACTTCAGTTCAGAATGG 3'     | <i>hlh-30</i>  | W02C12.3  | Forward Primer  | 5' ACAATATGATTGAACGCCGAC 3'    |
|                |           | Reverse Primer  | 5' CAATGGATTCTCTGGAGCA 3'       |                |           | Reverse Primer  | 5' TCTGATGTGTTCTTCGGCA 3'      |
| <i>ech-1.2</i> | T08B2.7   | Forward Primer  | 5' TGGATAAGCTCCAATCCGA 3'       | <i>daf-12</i>  | F11A1.3   | Forward Primer  | 5' CCAAACATTATGGCTCATCGT 3'    |
|                |           | Reverse Primer  | 5' ATTTGGATGTCAGCTCCTG 3'       |                |           | Reverse Primer  | 5' GGAAAGAACAACCTGTCCAC 3'     |
| <i>skn-1</i>   | T19E7.2   | Forward Primer  | 5' ACCAAACGATGTGTTCCCA 3'       | <i>mdt-15</i>  | R12B2.5   | Forward Primer  | 5' AATGGACCACCTGGTAGTG 3'      |
|                |           | Reverse Primer  | 5' CTGTCCATTTGATACAACCTGCT 3'   |                |           | Reverse Primer  | 5' ACGAGCTTGATCCATATCCT 3'     |
| <i>atfs-1</i>  | ZC376.7   | Forward Primer  | 5' CCGATCGAAGACGAATGTTG 3'      | <i>rpl-32</i>  | T24B8.1   | Forward Primer  | 5' GGATTTGGACATGCTCCTC 3'      |
|                |           | Reverse Primer  | 5' GAACTCCATTTTTCTTCCC 3'       |                |           | Reverse Primer  | 5' GATTCCCTTGCGGCTCTT 3'       |
