# Supplementary material for: DAF-16 and TCER-1 Facilitate Adaptation to Germline Loss by Restoring Lipid Homeostasis and Repressing Reproductive Physiology in C. elegans
Source: PubMed Central journal article supplement (PMC4749232; doi:10.1371/journal.pgen.1005788), 2016-02-10
Supplement: pgen.1005788.s021.pdf [file pgen.1005788.s021.pdf]

## **Supplementary References: References associated with S11 Table**

1. Phillips CM, Goumidi L, Bertrais S, Field MR, Cupples LA, Ordovas JM, et al. ACC2 gene polymorphisms, metabolic syndrome, and gene-nutrient interactions with dietary fat. *J Lipid Res.* 2010;51(12):3500-7. doi: 10.1194/jlr.M008474. PubMed PMID: 20855566; PubMed Central PMCID: PMC2975722.
2. Riancho JA, Vazquez L, Garcia-Perez MA, Sainz J, Olmos JM, Hernandez JL, et al. Association of ACACB polymorphisms with obesity and diabetes. *Mol Genet Metab.* 2011;104(4):670-6. doi: 10.1016/j.ymgme.2011.08.013. PubMed PMID: 21908218.
3. FitzPatrick DR, Hill A, Tolmie JL, Thorburn DR, Christodoulou J. The molecular basis of malonyl-CoA decarboxylase deficiency. *Am J Hum Genet.* 1999;65(2):318-26. doi: 10.1086/302492. PubMed PMID: 10417274; PubMed Central PMCID: PMC1377930.
4. Ficicioglu C, Chrisant MR, Payan I, Chace DH. Cardiomyopathy and hypotonia in a 5-month-old infant with malonyl-coa decarboxylase deficiency: potential for preclinical diagnosis with expanded newborn screening. *Pediatr Cardiol.* 2005;26(6):881-3. doi: 10.1007/s00246-005-1045-x. PubMed PMID: 16078122.
5. Menendez JA, Vazquez-Martin A, Ortega FJ, Fernandez-Real JM. Fatty acid synthase: association with insulin resistance, type 2 diabetes, and cancer. *Clin Chem.* 2009;55(3):425-38. doi: 10.1373/clinchem.2008.115352. PubMed PMID: 19181734.
6. Haas JT, Winter HS, Lim E, Kirby A, Blumenstiel B, DeFelice M, et al. DGAT1 mutation is linked to a congenital diarrheal disorder. *J Clin Invest.* 2012;122(12):4680-4. doi: 10.1172/JCI64873. PubMed PMID: 23114594; PubMed Central PMCID: PMC3533555.
7. Wang Z, Yao T, Song Z. Involvement and mechanism of DGAT2 upregulation in the pathogenesis of alcoholic fatty liver disease. *J Lipid Res.* 2010;51(11):3158-65. doi: 10.1194/jlr.M007948. PubMed PMID: 20739640; PubMed Central PMCID: PMC2952556.
8. Klar J, Schweiger M, Zimmerman R, Zechner R, Li H, Torma H, et al. Mutations in the fatty acid transport protein 4 gene cause the ichthyosis prematurity syndrome. *Am J Hum Genet.* 2009;85(2):248-53. doi: 10.1016/j.ajhg.2009.06.021. PubMed PMID: 19631310; PubMed Central PMCID: PMC2725242.
9. Kotronen A, Seppanen-Laakso T, Westerbacka J, Kiviluoto T, Arola J, Ruskeepaa AL, et al. Hepatic stearoyl-CoA desaturase (SCD)-1 activity and diacylglycerol but not ceramide concentrations are increased in the nonalcoholic human fatty liver. *Diabetes.* 2009;58(1):203-8. doi: 10.2337/db08-1074. PubMed PMID: 18952834; PubMed Central PMCID: PMC2606873.

10. Attie AD, Krauss RM, Gray-Keller MP, Brownlie A, Miyazaki M, Kastelein JJ, et al. Relationship between stearoyl-CoA desaturase activity and plasma triglycerides in human and mouse hypertriglyceridemia. *J Lipid Res.* 2002;43(11):1899-907. PubMed PMID: 12401889.
11. Anderson RA, Byrum RS, Coates PM, Sando GN. Mutations at the lysosomal acid cholesteryl ester hydrolase gene locus in Wolman disease. *Proceedings of the National Academy of Sciences of the United States of America.* 1994;91(7):2718-22. PubMed PMID: 8146180; PubMed Central PMCID: PMC43441.
12. Israeli S, Khamaysi Z, Fuchs-Telem D, Nousbeck J, Bergman R, Sarig O, et al. A mutation in LIPN, encoding epidermal lipase N, causes a late-onset form of autosomal-recessive congenital ichthyosis. *Am J Hum Genet.* 2011;88(4):482-7. doi: 10.1016/j.ajhg.2011.02.011. PubMed PMID: 21439540; PubMed Central PMCID: PMC3071911.
13. Pagani F, Garcia R, Pariyarath R, Stuani C, Gridelli B, Paone G, et al. Expression of lysosomal acid lipase mutants detected in three patients with cholesteryl ester storage disease. *Hum Mol Genet.* 1996;5(10):1611-7. PubMed PMID: 8894696.
14. Zschenker O, Illies T, Ameis D. Overexpression of lysosomal acid lipase and other proteins in atherosclerosis. *J Biochem.* 2006;140(1):23-38. doi: 10.1093/jb/mvj137. PubMed PMID: 16877765.
15. Fischer J, Lefevre C, Morava E, Mussini JM, Laforet P, Negre-Salvayre A, et al. The gene encoding adipose triglyceride lipase (PNPLA2) is mutated in neutral lipid storage disease with myopathy. *Nature genetics.* 2007;39(1):28-30. doi: 10.1038/ng1951. PubMed PMID: 17187067.
16. Nanni L, Quagliarini F, Megiorni F, Montali A, Minicocci I, Campagna F, et al. Genetic variants in adipose triglyceride lipase influence lipid levels in familial combined hyperlipidemia. *Atherosclerosis.* 2010;213(1):206-11. doi: 10.1016/j.atherosclerosis.2010.08.055. PubMed PMID: 20832801.
17. Piccini M, Vitelli F, Bruttini M, Pober BR, Jonsson JJ, Villanova M, et al. FA4L4, a new gene encoding long-chain acyl-CoA synthetase 4, is deleted in a family with Alport syndrome, elliptocytosis, and mental retardation. *Genomics.* 1998;47(3):350-8. doi: 10.1006/geno.1997.5104. PubMed PMID: 9480748.
18. Cao Y, Dave KB, Doan TP, Prescott SM. Fatty acid CoA ligase 4 is up-regulated in colon adenocarcinoma. *Cancer Res.* 2001;61(23):8429-34. PubMed PMID: 11731423.
19. Thuillier L, Rostane H, Droin V, Demaugre F, Brivet M, Kadhom N, et al. Correlation between genotype, metabolic data, and clinical presentation in carnitine palmitoyltransferase 2 (CPT2) deficiency. *Hum Mutat.* 2003;21(5):493-501. doi: 10.1002/humu.10201. PubMed PMID: 12673791.

20. Nguyen TV, Andresen BS, Corydon TJ, Ghisla S, Abd-El Razik N, Mohsen AW, et al. Identification of isobutyryl-CoA dehydrogenase and its deficiency in humans. *Mol Genet Metab.* 2002;77(1-2):68-79. PubMed PMID: 12359132.
21. Sakai C, Yamaguchi S, Sasaki M, Miyamoto Y, Matsushima Y, Goto Y. ECHS1 mutations cause combined respiratory chain deficiency resulting in Leigh syndrome. *Hum Mutat.* 2015;36(2):232-9. doi: 10.1002/humu.22730. PubMed PMID: 25393721.
22. Peters H, Buck N, Wanders R, Ruiten J, Waterham H, Koster J, et al. ECHS1 mutations in Leigh disease: a new inborn error of metabolism affecting valine metabolism. *Brain.* 2014;137(Pt 11):2903-8. doi: 10.1093/brain/awu216. PubMed PMID: 25125611.
23. Dionisi Vici C, Burlina AB, Bertini E, Bachmann C, Mazziotta MR, Zacchello F, et al. Progressive neuropathy and recurrent myoglobinuria in a child with long-chain 3-hydroxyacyl-coenzyme A dehydrogenase deficiency. *J Pediatr.* 1991;118(5):744-6. PubMed PMID: 2019931.
24. Choi JH, Yoon HR, Kim GH, Park SJ, Shin YL, Yoo HW. Identification of novel mutations of the HADHA and HADHB genes in patients with mitochondrial trifunctional protein deficiency. *Int J Mol Med.* 2007;19(1):81-7. PubMed PMID: 17143551.
25. Ferdinandusse S, Denis S, Hogenhout EM, Koster J, van Roermund CW, L IJ, et al. Clinical, biochemical, and mutational spectrum of peroxisomal acyl-coenzyme A oxidase deficiency. *Hum Mutat.* 2007;28(9):904-12. doi: 10.1002/humu.20535. PubMed PMID: 17458872.
26. Johansson A, Curran JE, Johnson MP, Freed KA, Fenstad MH, Bjorge L, et al. Identification of ACOX2 as a shared genetic risk factor for preeclampsia and cardiovascular disease. *Eur J Hum Genet.* 2011;19(7):796-800. doi: 10.1038/ejhg.2011.19. PubMed PMID: 21343950; PubMed Central PMCID: PMC3137494.
27. Ruiz-Romero C, Calamia V, Mateos J, Carreira V, Martinez-Gomariz M, Fernandez M, et al. Mitochondrial dysregulation of osteoarthritic human articular chondrocytes analyzed by proteomics: a decrease in mitochondrial superoxide dismutase points to a redox imbalance. *Mol Cell Proteomics.* 2009;8(1):172-89. doi: 10.1074/mcp.M800292-MCP200. PubMed PMID: 18784066; PubMed Central PMCID: PMC2713027.
28. Fontaine-Bisson B, Renstrom F, Rolandsson O, Magic, Payne F, Hallmans G, et al. Evaluating the discriminative power of multi-trait genetic risk scores for type 2 diabetes in a northern Swedish population. *Diabetologia.* 2010;53(10):2155-62. doi: 10.1007/s00125-010-1792-y. PubMed PMID: 20571754; PubMed Central PMCID: PMC2931645.
29. Fukao T, Scriver CR, Kondo N, t2 Collaborative Working G. The clinical phenotype and outcome of mitochondrial acetoacetyl-CoA thiolase deficiency (beta-ketothiolase or T2 deficiency) in 26 enzymatically proved and mutation-defined patients. *Mol Genet Metab.* 2001;72(2):109-14. doi: 10.1006/mgme.2000.3113. PubMed PMID: 11161836.

30. Flanagan SE, Patch AM, Locke JM, Akcay T, Simsek E, Alaei M, et al. Genome-wide homozygosity analysis reveals HADH mutations as a common cause of diazoxide-responsive hyperinsulinemic-hypoglycemia in consanguineous pedigrees. *The Journal of clinical endocrinology and metabolism*. 2011;96(3):E498-502. doi: 10.1210/jc.2010-1906. PubMed PMID: 21252247; PubMed Central PMCID: PMC3100671.
