# Supplementary material for: DAF-16 and TCER-1 Facilitate Adaptation to Germline Loss by Restoring Lipid Homeostasis and Repressing Reproductive Physiology in C. elegans
Source: PLoS Genet. 2016 Feb 10;12(2):e1005788. doi: 10.1371/journal.pgen.1005788 (PMC4749232; doi:10.1371/journal.pgen.1005788)
Supplement: S5 Table — (XLSX) [file pgen.1005788.s013.xlsx]

## Sheet: TableS5-Key
	Amrit et al., Table S5: REVIGO Analysis of DAF-16 and TCER-1 targets identified by RNA-Seq and analyzed by DAVID
	Tab	WORKSHEET	RNA-Seq Gene Class
	1	TableS5-A	DAF-16-Specific UP
	2	TableS5-B	DAF-16-Specific DOWN
	3	TableS5-C	TCER-1-Specific UP
	4	TableS5-D	TCER-1-Specific DOWN
	5	TableS5-E	Joint DAF-16 and TCER-1 UP
	6	TableS5-F	Joint DAF-16 and TCER-1 DOWN

## Sheet: TableS5-A
	Table S5A: DAF-16-Specific UP
term_ID	description	frequency	plot_X	plot_Y	plot_size	log10 p-value	uniqueness	dispensability	representative	eliminated
GO:0006631	fatty acid metabolic process	0.00855	5.583	-2.41	1.934	-4.0467	0.58	0	6631	0
GO:0016053	organic acid biosynthetic process	0.01419	null	null	2.152	-3.4597	0.604	0.915	6631	1
GO:0046394	carboxylic acid biosynthetic process	0.01419	null	null	2.152	-3.4597	0.596	0.702	6631	1
GO:0033559	unsaturated fatty acid metabolic process	0.00141	null	null	1.176	-1.868	0.619	0.778	6631	1
GO:0006636	unsaturated fatty acid biosynthetic process	0.00131	null	null	1.146	-1.9864	0.586	0.773	6631	1
GO:0006633	fatty acid biosynthetic process	0.00503	null	null	1.708	-3.644	0.551	0.879	6631	1
GO:0008340	determination of adult lifespan	0.01891	-6.857	0.722	2.276	-2.8408	0.779	0	8340	0
GO:0010259	multicellular organismal aging	0.01891	null	null	2.276	-2.8416	0.779	0.977	8340	1
GO:0007167	enzyme linked receptor protein signaling pathway	0.01449	-0.56	2.182	2.161	-2.2242	0.807	0.058	7167	0
GO:0005991	trehalose metabolic process	0.00131	-2.02	-6.81	1.146	-1.9864	0.706	0.068	5991	0
GO:0034637	cellular carbohydrate biosynthetic process	0.00151	null	null	1.204	-1.1147	0.676	0.713	5991	1
GO:0005984	disaccharide metabolic process	0.00131	null	null	1.146	-1.9864	0.706	0.926	5991	1
GO:0006468	protein phosphorylation	0.06529	0.817	7.013	2.813	-1.0977	0.774	0.104	6468	0
GO:0040010	positive regulation of growth rate	0.00433	-0.326	-2.099	1.643	-1.7242	0.766	0.146	40010	0
GO:0045927	positive regulation of growth	0.01177	null	null	2.072	-1.6264	0.753	0.862	40010	1
GO:0040009	regulation of growth rate	0.00483	null	null	1.69	-1.7196	0.764	0.729	40010	1
GO:0040008	regulation of growth	0.01831	null	null	2.262	-1.531	0.755	0.78	40010	1
GO:0006793	phosphorus metabolic process	0.17072	4.575	5.066	3.23	-0.563	0.831	0.173	6793	0
GO:0016137	glycoside metabolic process	0.0001	6.715	-0.994	0.301	-1.868	0.82	0.191	16137	0
GO:0022611	dormancy process	0.00151	-6.121	1.892	1.204	-2.0843	0.853	0.277	22611	0
GO:0040024	dauer larval development	0.01056	-6.714	-0.295	2.025	-2.6207	0.811	0.377	40024	0
GO:0007166	cell surface receptor signaling pathway	0.07183	0.749	1.028	2.854	-0.0914	0.805	0.403	7166	0
GO:0007568	aging	0.01922	-6.807	1.823	2.283	-2.8408	0.813	0.439	7568	0
GO:0043053	dauer entry	0.0003	-6.67	-1.165	0.602	-1.5854	0.832	0.458	43053	0
GO:0007169	transmembrane receptor protein tyrosine kinase signaling pathway	0.00835	0.019	1.888	1.924	-1.154	0.812	0.542	7169	0
GO:0016310	phosphorylation	0.08219	1.511	6.83	2.913	-0.683	0.781	0.568	16310	0
GO:0009311	oligosaccharide metabolic process	0.00211	-1.544	-6.948	1.342	-1.6752	0.745	0.599	9311	0
GO:0016042	lipid catabolic process	0.00584	5.569	-3.381	1.771	-0.9858	0.685	0.62	16042	0
GO:0016051	carbohydrate biosynthetic process	0.00382	-0.422	-6.762	1.591	-0.9484	0.689	0.654	16051	0
GO:0006796	phosphate-containing compound metabolic process	0.16811	2.147	6.52	3.223	-0.563	0.772	0.685	6796	0
GO:0008610	lipid biosynthetic process	0.0168	4.741	-4.032	2.225	-2.5682	0.645	0.695	8610	0

## Sheet: TableS5-B
	Table S5B: DAF-16-Specific DOWN
term_ID	description	frequency	plot_X	plot_Y	plot_size	log10 p-value	uniqueness	dispensability	representative	eliminated
GO:0006412	translation	0.03199	-3.842	-2.847	2.504	-12.4413	0.845	0	6412	0
GO:0018988	molting cycle, protein-based cuticle	0.00854	-3.883	2.713	1.934	-3.2857	0.842	0	18988	0
GO:0018996	molting cycle, collagen and cuticulin-based cuticle	0.00805	6.086	2.061	1.908	-3.2857	0.625	0	18996	0
GO:0040007	growth	0.02404	0.242	7.154	2.38	-2.6572	0.844	0	40007	0
GO:0040010	positive regulation of growth rate	0.00433	0.357	-7.228	1.643	-2.3627	0.527	0	40010	0
GO:0040009	regulation of growth rate	0.00483	null	null	1.69	-2.3587	0.525	0.729	40010	1
GO:0040008	regulation of growth	0.01831	null	null	2.262	-2.0241	0.514	0.78	40010	1
GO:0045927	positive regulation of growth	0.01177	null	null	2.072	-1.9754	0.508	0.862	40010	1
GO:0042303	molting cycle	0.00815	6.035	-2.005	1.914	-3.2716	0.624	0.261	42303	0
GO:0002119	nematode larval development	0.04759	5.471	-0.096	2.676	-1.6874	0.496	0.321	2119	0
GO:0002164	larval development	0.04789	null	null	2.679	-1.6842	0.496	0.933	2119	1
GO:0009792	embryo development ending in birth or egg hatching	0.02807	7.052	-0.265	2.447	-0.9308	0.558	0.486	9792	0
GO:0009791	post-embryonic development	0.0503	6.316	0.358	2.7	-1.6274	0.544	0.533	9791	0

## Sheet: TableS5-C
	Table S5C: TCER-1-Specific UP
term_ID	description	frequency	plot_X	plot_Y	plot_size	log10 p-value	uniqueness	dispensability	representative	eliminated
GO:0009410	response to xenobiotic stimulus	0.0008	0.943	-6.515	0.954	-4.433	0.879	0	9410	0
GO:0030258	lipid modification	0.00483	6.294	-0.881	1.69	-4.0218	0.566	0	30258	0
GO:0018958	phenol-containing compound metabolic process	0.00111	3.979	6.495	1.079	-1.3244	0.432	0.064	18958	0
GO:0006518	peptide metabolic process	0.00362	-3.303	-3.269	1.568	-2.0322	0.393	0.071	6518	0
GO:0043043	peptide biosynthetic process	0.0008	null	null	0.954	-1.383	0.366	1.171	6518	1
GO:0019540	siderophore biosynthetic process from catechol	0.0008	null	null	0.954	-1.4813	0.042	1.453	6518	1
GO:0019184	nonribosomal peptide biosynthetic process	0.0004	null	null	0.699	-1.4813	0.356	1.243	6518	1
GO:0009239	enterobactin biosynthetic process	0.02637	null	null	2.42	-1.4813	0.01	1.109	6518	1
GO:0009237	siderophore metabolic process	0.00237	null	null	1.38	-1.4813	0.193	1.531	6518	1
GO:0009712	catechol-containing compound metabolic process	0.00091	null	null	1	-1.3244	0.29	1.296	6518	1
GO:0009238	enterobactin metabolic process	0.05603	null	null	2.746	-1.4813	0.001	2.273	6518	1
GO:0019290	siderophore biosynthetic process	0.00144	null	null	1.176	-1.4813	0.084	1.535	6518	1
GO:0051186	cofactor metabolic process	0.01167	-4.45	1.496	2.068	-1.0996	0.761	0.079	51186	0
GO:0051188	cofactor biosynthetic process	0.00775	-2.255	6.167	1.892	-0.5555	0.363	0.083	51188	0
GO:0055114	oxidation-reduction process	0.06972	6.947	0.691	2.841	-10.5817	0.557	0.334	55114	0
GO:0030259	lipid glycosylation	0.0001	6.322	-2.09	0.301	-2.6723	0.631	0.49	30259	0
GO:0034311	diol metabolic process	0.00101	5.26	3.552	1.041	-1.3244	0.38	0.685	34311	0

## Sheet: TableS5-D
	TABLE S5: TCER-1-Specific DOWN
term_ID	description	frequency	plot_X	plot_Y	plot_size	log10 p-value	uniqueness	dispensability	representative	eliminated
GO:0007610	behavior	0.04708	6.332	4.142	2.671	-1.6466	0.916	0	7610	0
GO:0018988	molting cycle, protein-based cuticle	0.00854	-5.087	-2.499	1.934	-2.5202	0.953	0	18988	0
GO:0040010	positive regulation of growth rate	0.00433	-1.671	-0.697	1.643	-3.5229	0.849	0	40010	0
GO:0045927	positive regulation of growth	0.01177	null	null	2.072	-3.2628	0.843	0.862	40010	1
GO:0040009	regulation of growth rate	0.00483	null	null	1.69	-3.5157	0.849	0.729	40010	1
GO:0040008	regulation of growth	0.01831	null	null	2.262	-3.0894	0.845	0.78	40010	1
GO:0046700	heterocycle catabolic process	0.04769	0.048	5.829	2.677	-4.0168	0.816	0	46700	0
GO:0030036	actin cytoskeleton organization	0.01479	-2.288	-6.682	2.17	-3.2418	0.766	0.02	30036	0
GO:0051146	striated muscle cell differentiation	0.00473	null	null	1.681	-1.1509	0.67	0.936	30036	1
GO:0031032	actomyosin structure organization	0.00423	null	null	1.633	-1.2426	0.783	0.841	30036	1
GO:0030239	myofibril assembly	0.00423	null	null	1.633	-1.2426	0.588	0.841	30036	1
GO:0042692	muscle cell differentiation	0.00614	null	null	1.792	-0.9665	0.676	0.86	30036	1
GO:0055001	muscle cell development	0.00473	null	null	1.681	-1.1094	0.67	0.945	30036	1
GO:0055002	striated muscle cell development	0.00463	null	null	1.672	-1.1509	0.669	0.983	30036	1
GO:0046903	secretion	0.01006	3.549	4.407	2.004	-0.5551	0.91	0.054	46903	0
GO:0008340	determination of adult lifespan	0.01891	3.999	-4.436	2.276	-3.0482	0.663	0.059	8340	0
GO:0010259	multicellular organismal aging	0.01891	null	null	2.276	-3.0482	0.663	0.977	8340	1
GO:0030029	actin filament-based process	0.016	-6.754	-2.261	2.204	-3.1337	0.883	0.098	30029	0
GO:0051188	cofactor biosynthetic process	0.00775	-5.739	2.16	1.892	-2.3876	0.8	0.098	51188	0
GO:0006732	coenzyme metabolic process	0.01127	null	null	2.053	-1.1917	0.826	0.941	51188	1
GO:0009108	coenzyme biosynthetic process	0.00734	null	null	1.869	-1.1062	0.801	0.9	51188	1
GO:0051186	cofactor metabolic process	0.01167	-2.787	1.752	2.068	-2.344	0.902	0.104	51186	0
GO:0030421	defecation	0.00573	5.918	-1.737	1.763	-1.1579	0.805	0.276	30421	0
GO:0018996	molting cycle, collagen and cuticulin-based cuticle	0.00805	6.434	-3.523	1.908	-2.5202	0.813	0.286	18996	0
GO:0042303	molting cycle	0.00815	6.152	-2.855	1.914	-2.5031	0.813	0.287	42303	0
GO:0033057	multicellular organismal reproductive behavior	0.02254	6.481	-0.187	2.352	-2.6922	0.726	0.306	33057	0
GO:0019098	reproductive behavior	0.02445	null	null	2.387	-2.6321	0.809	0.776	33057	1
GO:0018991	oviposition	0.01962	null	null	2.292	-2.3471	0.729	0.954	33057	1
GO:0048609	multicellular organismal reproductive process	0.04507	null	null	2.652	-2.4343	0.735	0.855	33057	1
GO:0010927	cellular component assembly involved in morphogenesis	0.00855	-0.137	-6.827	1.934	-1.2426	0.682	0.401	10927	0
GO:0009310	amine catabolic process	0.00091	0.775	6.044	1	-1.4416	0.824	0.431	9310	0
GO:0009309	amine biosynthetic process	0.00231	null	null	1.38	-1.0577	0.812	0.748	9310	1
GO:0007568	aging	0.01922	1.816	-7.256	2.283	-3.0482	0.772	0.439	7568	0
GO:0007588	excretion	0.00594	5.858	-1.331	1.778	-1.1062	0.804	0.54	7588	0
GO:0046395	carboxylic acid catabolic process	0.00503	-1.18	5.407	1.708	-1.953	0.723	0.567	46395	0
GO:0016054	organic acid catabolic process	0.00503	null	null	1.708	-1.953	0.726	0.93	46395	1
GO:0009063	cellular amino acid catabolic process	0.00332	null	null	1.531	-1.6044	0.711	0.957	46395	1
GO:0032989	cellular component morphogenesis	0.02545	-0.426	-6.629	2.405	-0.6887	0.666	0.613	32989	0
GO:0007010	cytoskeleton organization	0.03018	-2.516	-6.397	2.479	-1.7012	0.783	0.644	7010	0
GO:0046394	carboxylic acid biosynthetic process	0.01419	-4.035	4.078	2.152	-1.8719	0.732	0.663	46394	0
GO:0016053	organic acid biosynthetic process	0.01419	null	null	2.152	-1.8719	0.737	0.915	46394	1
GO:0008652	cellular amino acid biosynthetic process	0.00855	null	null	1.934	-1.37	0.709	0.93	46394	1
GO:0032504	multicellular organism reproduction	0.04557	6.916	-1.788	2.657	-2.4232	0.754	0.667	32504	0

## Sheet: TableS5-E
	TABLE S5E: Joint DAF-16 and TCER-1 UP
term_ID	description	frequency	plot_X	plot_Y	plot_size	log10 p-value	uniqueness	dispensability	representative	eliminated
GO:0008340	determination of adult lifespan	0.01891	-4.99	1.44	2.276	-2.9887	0.665	0	8340	0
GO:0010259	multicellular organismal aging	0.01891	null	null	2.276	-2.9887	0.665	0.977	8340	1
GO:0046395	carboxylic acid catabolic process	0.00503	5.301	-2.125	1.708	-2.7734	0.244	0	46395	0
GO:0016054	organic acid catabolic process	0.00503	null	null	1.708	-2.7734	0.255	0.93	46395	1
GO:0006635	fatty acid beta-oxidation	0.00171	null	null	1.255	-2.7264	0.112	0.903	46395	1
GO:0009062	fatty acid catabolic process	0.00171	null	null	1.255	-2.7264	0.14	0.998	46395	1
GO:0019395	fatty acid oxidation	0.00181	null	null	1.279	-2.6411	0.179	0.994	46395	1
GO:0034440	lipid oxidation	0.00181	4.493	2.102	1.279	-2.6411	0.259	0.23	34440	0
GO:0055114	oxidation-reduction process	0.06972	3.832	-1.701	2.841	-4.5003	0.463	0.336	55114	0
GO:0007568	aging	0.01922	-5.051	-0.699	2.283	-2.9887	0.735	0.439	7568	0
GO:0016042	lipid catabolic process	0.00584	5.42	0.157	1.771	-1.3805	0.282	0.536	16042	0
GO:0044242	cellular lipid catabolic process	0.00362	4.608	0.587	1.568	-2.1631	0.213	0.597	44242	0
GO:0030258	lipid modification	0.00483	5.133	1.514	1.69	-2.1413	0.272	0.651	30258	0
GO:0006631	fatty acid metabolic process	0.00855	null	null	1.934	-1.4134	0.17	0.706	30258	1

## Sheet: TableS5-F
	TABLE S5F: Joint DAF-16 and TCER-1 DOWN
term_ID	description	frequency	plot_X	plot_Y	plot_size	log10 p-value	uniqueness	dispensability	representative	eliminated
GO:0008340	determination of adult lifespan	0.01891	5.046	0.384	2.276	-2.751	0.378	0	8340	0
GO:0010259	multicellular organismal aging	0.01891	null	null	2.276	-2.751	0.378	0.977	8340	1
GO:0040007	growth	0.02404	-2.592	-5.146	2.38	-1.6923	0.83	0	40007	0
GO:0040008	regulation of growth	0.01831	-2.886	4.702	2.262	-2.2388	0.478	0	40008	0
GO:0040009	regulation of growth rate	0.00483	null	null	1.69	-1.8305	0.489	0.78	40008	1
GO:0040010	positive regulation of growth rate	0.00433	null	null	1.643	-1.8325	0.491	0.771	40008	1
GO:0045927	positive regulation of growth	0.01177	null	null	2.072	-2.3757	0.471	0.862	40008	1
GO:0007568	aging	0.01922	5.957	1.569	2.283	-2.751	0.457	0.439	7568	0
GO:0002119	nematode larval development	0.04759	6.495	-1.027	2.676	-2.2111	0.378	0.458	2119	0
GO:0002164	larval development	0.04789	null	null	2.679	-2.2089	0.378	0.933	2119	1
GO:0009792	embryo development ending in birth or egg hatching	0.02807	6.674	0.332	2.447	-1.1482	0.426	0.486	9792	0
GO:0009791	post-embryonic development	0.0503	5.467	-1.071	2.7	-2.1695	0.423	0.533	9791	0
